# Supplementary material for: Internists‘ career choice towards primary care: a cross-sectional survey
Source: PubMed Central journal article supplement (PMC5382387; doi:10.1186/s12875-017-0624-2), 2017-04-05

3287 sent  
questionnaires

1749 returned  
questionnaires

266 not fullfilling  
inclusion criteria

21 excluded

**1462 included in  
the analysis**

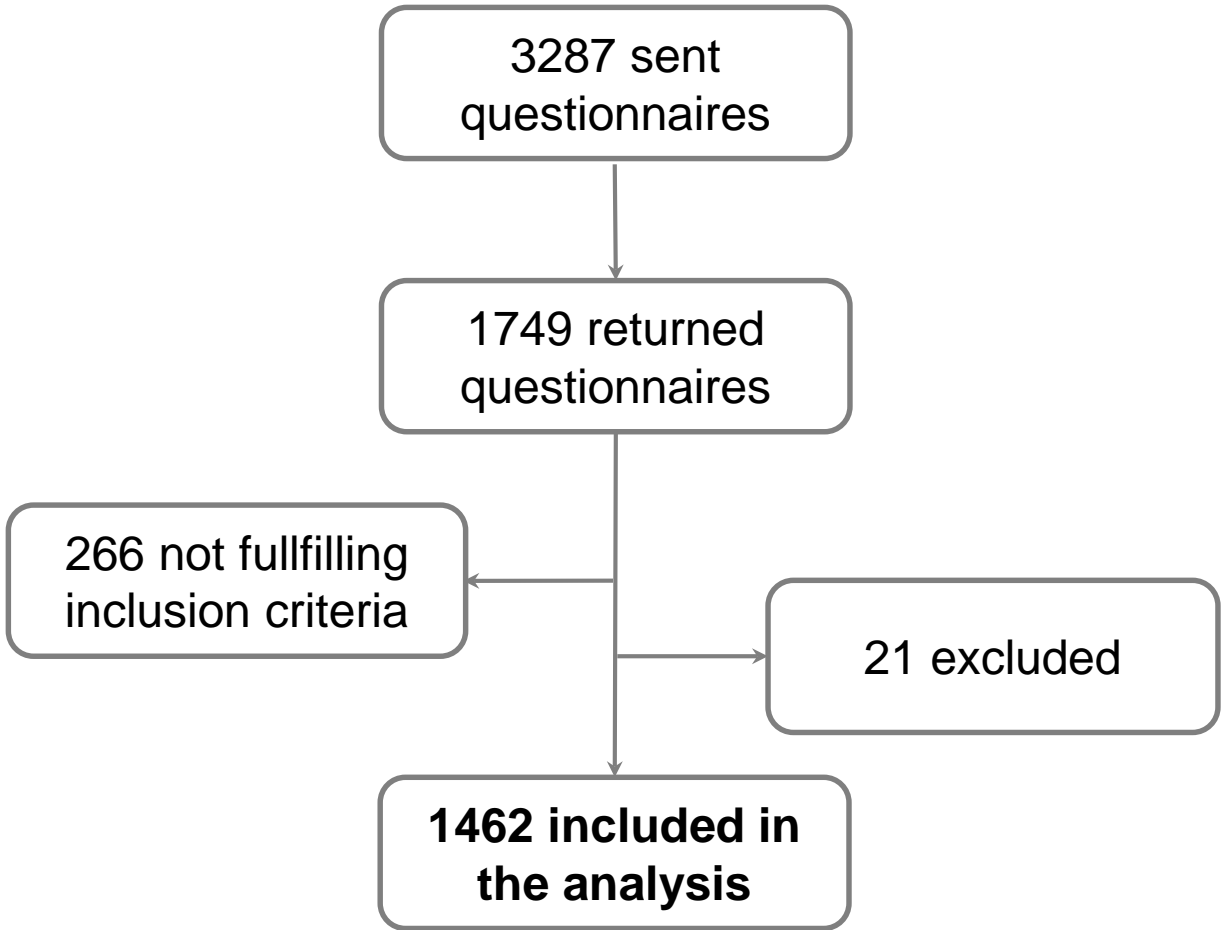

Supplement: 12875_2017_624_MOESM1_ESM.pdf [file 12875_2017_624_MOESM1_ESM.pdf]
